# Supplementary material for: A Mobile App (mHeart) to Detect Medication Nonadherence in the Heart Transplant Population: Validation Study
Source: PubMed Central journal article supplement (PMC7055830; doi:10.2196/15957), 2020-02-04
Supplement: mhealth_v8i2e15957_app5.pdf [file mhealth_v8i2e15957_app5.pdf]

## Multimedia Appendix 5. Electronic version of the Haynes-Sackett questionnaire including 6 additional responses by patients to improve provider understanding of their difficulties with medication adapted for use with the mHeart platform

**Item 1. Most patients have difficulty taking all their tablets. Do you have difficulties taking yours?  
Please select an option...**

- No, I do not have any difficulties
- Yes,
  - Yes, I sometimes forget to take my medication
  - Yes, I lack information about the medication and/or the disease
  - Yes, I feel demotivated about taking my medication
  - Yes, because of side effects or fear of having them
  - Yes, because of complex regimens and/or inconvenient regimens
  - Yes, for other reasons

---

<sup>a</sup>The Haynes-Sackett questionnaire score is based on the response to item 1: No (adherent) or Yes (non-adherent).

<sup>b</sup>The 6 additional responses were added to improve provider understanding of patients' difficulties with medication for use with the mHeart platform. The patient is able to tick more than one response.
