# Supplementary material for: A Mobile App (mHeart) to Detect Medication Nonadherence in the Heart Transplant Population: Validation Study
Source: PubMed Central journal article supplement (PMC7055830; doi:10.2196/15957), 2020-02-04
Supplement: mhealth_v8i2e15957_app6.pdf [file mhealth_v8i2e15957_app6.pdf]

This is a Multimedia Appendix to a full manuscript published in the J Med Internet Res.  
For full copyright and citation information see <http://dx.doi.org/10.2196/jmir.xxxx>

Multimedia Appendix 6. Patient Satisfaction and Usability Survey Original Spanish Version (the results and items translation to English language are provided in Multimedia Appendix 11).

# Encuesta de Satisfacción de la Plataforma Nabelia Salud - Trasplante Cardíaco. Hospital de la Santa Creu i Sant Pau

\* Obligatòria

## ¡Bienvenido!

El equipo de Trasplante Cardíaco del Hospital de la Santa Creu i Sant Pau, le da las gracias por responder las preguntas que le adjuntamos a continuación.

Su opinión sobre la plataforma Nabelia Trasplante cardíaco es muy importante para nosotros.

Si tiene cualquier duda llámenos al 661787173.

1. **Antes de empezar, ¿nos puede indicar cuánto tiempo (en años) hace del trasplante?**

---

2. **La frecuencia con la que utilizo la aplicación móvil o página web es: \***

*Maqueu només un oval.*

- No la uso
- Ocasionalmente
- Cada 15 días
- Cada semana
- Dos o tres veces por semana
- Cada día

3. **Habitualmente utilizo la plataforma a través de: \***

*Maqueu només un oval.*

- Página web
- Aplicación móvil (app)
- Ambas por igual

**4. El uso de la plataforma y su funcionamiento general me resulta: \***

Conteste un número del 1 al 10 (1.Muy complicado - 10.Muy sencillo)

*Maqueu només un oval.*

- 1 . Muy complicado
- 2
- 3
- 4
- 5
- 6
- 7
- 8
- 9
10. Muy sencillo
- No sabe/No contesta

**5. El usuario y la contraseña para acceder a la plataforma me resultan simples y fáciles de recordar: \***

Conteste un número del 1 al 10 (1.Poco - 10.Mucho)

*Maqueu només un oval.*

- 1 . Poco
- 2
- 3
- 4
- 5
- 6
- 7
- 8
- 9
10. Mucho
- No sabe/No contesta

**6. La formación inicial telefónica que recibí de Nabelia sobre el uso de la plataforma, me resultó: \***

Conteste un número del 1 al 10 (1.Poco útil - 10.Muy útil)

*Maqueu només un oval.*

- 1 . Poco útil
- 2
- 3
- 4
- 5
- 6
- 7
- 8
- 9
10. Muy útil
- No he recibido formación en el uso de la plataforma

**7. Si he tenido dudas y/o incidencias, el soporte técnico de Nabelia me ha resultado: \***

Conteste un número del 1 al 10 (1.Poco útil - 10.Muy útil)

*Maqueu només un oval.*

- 1 . Poco útil
- 2
- 3
- 4
- 5
- 6
- 7
- 8
- 9
10. Muy útil
- No he tenido dudas/incidencias

**8. Anotar el peso, tensión, frecuencia cardíaca, etc. en la plataforma, me incentiva a llevar un mejor control: \***

Conteste un número del 1 al 10 (1.Poco - 10.Mucho)

*Maqueu només un oval.*

- 1 . Poco
- 2
- 3
- 4
- 5
- 6
- 7
- 8
- 9
10. Mucho
- No sabe/No contesta

**9. Registrar el peso, tensión, frecuencia cardíaca, etc. en la plataforma, me resulta: \***

Conteste un número del 1 al 10 (1.Complicado - 10. Sencillo)

*Maqueu només un oval.*

- 1 . Complicado
- 2
- 3
- 4
- 5
- 6
- 7
- 8
- 9
10. Sencillo
- No sabe/No contesta

**10. Los avisos en la agenda para recordar que registre la tensión, peso, frecuencia cardíaca, etc., me resultan: \***

Conteste un número del 1 al 10 (1.Molesta - 10. Conveniente)

*Maqueu només un oval.*

- 1 . Molesta
- 2
- 3
- 4
- 5
- 6
- 7
- 8
- 9
10. Conveniente
- No sabe/No contesta

**11. Si tengo algún síntoma (cefalea, diarrea, dolor muscular, etc.), lo registro en el apartado de síntomas de la plataforma: \***

Conteste un número del 1 al 10 (1. Nunca - 10. Siempre)

*Maqueu només un oval.*

- 1 . Nunca
- 2
- 3
- 4
- 5
- 6
- 7
- 8
- 9
10. Siempre
- No he tenido síntomas que registrar

**12. El registro de los síntomas en la plataforma me resulta: \***

Conteste un número del 1 al 10 (1. Complicado - 10. Sencillo)

*Maqueu només un oval.*

- 1 . Complicado
- 2
- 3
- 4
- 5
- 6
- 7
- 8
- 9
10. Sencillo
- No sabe/No contesta

**13. El apartado de Consejos de la plataforma me resulta: \***

Conteste un número del 1 al 10 (1.Poco útil - 10.Muy útil)

*Maqueu només un oval.*

- 1 . Poco útil
- 2
- 3
- 4
- 5
- 6
- 7
- 8
- 9
10. Muy útil
- No sabe/No contesta

**14. He consultado los consejos a través de la plataforma: \****Maqueu només un oval.*

- Nunca los he consultado
- Entre 1 y 5 veces
- Más de 5 veces

**15. ¿Qué información le gustaría que apareciera en los Consejos? \***

Se puede marcar más de una opción. Puede añadir sugerencias en el campo libre.

*Seleccioneu totes les opcions que corresponguin.*

- Videos informativos realizados por el personal sanitario que le atiende
- Páginas web de consulta sobre trasplante
- Páginas web de consulta sobre su salud en general
- Altres: \_\_\_\_\_

**16. Para consultar si puedo tomar una nueva terapia (medicamento, plantas, infusiones, homeopatía u otra terapia alternativa), utilizo: \***

Se puede marcar más de una opción.

*Seleccioneu totes les opcions que corresponguin.*

- El apartado de "nuevo tratamiento" de la plataforma
- La mensajería de la plataforma
- El teléfono, llamo a la farmacéutica
- El teléfono, llamo al médico
- No he tenido que consultar
- No sabe/No contesta

**17. Registrar en la agenda si tomo los medicamentos, me resulta: \***

Conteste un número del 1 al 10 (1. Molesto - 10. Conveniente)

*Maqueu només un oval.*

- 1 . Molesto
- 2
- 3
- 4
- 5
- 6
- 7
- 8
- 9
- 10. Conveniente
- No sabe/No contesta

**18. Recibir avisos con los cambios de tratamiento, me resulta: \***

Conteste un número del 1 al 10 (1.Poco útil - 10.Muy útil)

*Maqueu només un oval.*

- 1 . Poco útil
- 2
- 3
- 4
- 5
- 6
- 7
- 8
- 9
- 10. Muy útil
- No sabe/No contesta



**19. Recibir recordatorios en mi móvil del horario de las tomas de la medicación, me resulta: \***

Conteste un número del 1 al 10 (1.Molesto - 10. Conveniente)

*Maqueu només un oval.*

- 1 . Molesto
- 2
- 3
- 4
- 5
- 6
- 7
- 8
- 9
10. Conveniente
- No sabe/No contesta

**20. Utilizo la agenda de la plataforma como agenda personal: \***

Conteste un número del 1 al 10 (1. Nunca - 10. Siempre)

*Maqueu només un oval.*

- 1 . Nunca
- 2
- 3
- 4
- 5
- 6
- 7
- 8
- 9
10. Siempre
- No sabe/No contesta

**21. Los cuestionarios de cumplimiento y actitud frente a la terapia me resultan: \***

Conteste un número del 1 al 10 (1. Molestos - 10. Adecuados)

*Maqueu només un oval.*

- 1 . Molestos
- 2
- 3
- 4
- 5
- 6
- 7
- 8
- 9
10. Adecuados
- No sabe/No contesta

**22. Utilizar la mensajería de la plataforma para contactar con mi profesional sanitario, me resulta: \***

Conteste un número del 1 al 10 (1. Complicado de utilizar - 10. Fácil de utilizar)

*Maqueu només un oval.*

- 1 . Complicado de utilizar
- 2
- 3
- 4
- 5
- 6
- 7
- 8
- 9
10. Fácil de utilizar
- No sabe/No contesta

**23. Disponer de la mensajería de la plataforma para resolver dudas con mi farmacéutica o enfermera, me resulta: \***

Conteste un número del 1 al 10 (1.Poco útil - 10.Muy útil)

*Maqueu només un oval.*

- 1 . Poco útil
- 2
- 3
- 4
- 5
- 6
- 7
- 8
- 9
10. Muy útil
- No sabe/No contesta

*Passeu a la pregunta 24.*

**Para finalizar, queremos saber su opinión sobre qué le está aportando la plataforma que hemos desarrollado para usted.**

La finalidad del equipo de trasplante, es adaptar el uso de la plataforma a cada persona.

Con sus respuestas nos ayuda a mejorar.

**24. Desde que uso la plataforma, me siento: \***

Puede marcar más de una opción.

*Seleccioneu totes les opcions que corresponguin.*

- Acompañado por mi equipo asistencial
- Más seguro al poder consultar mis dudas
- Que controlo mejor mi salud en general
- Sobrecargado por las tareas en la plataforma
- Abrumado por los mensajes de mi equipo asistencial
- Altres: \_\_\_\_\_

**25. ¿Tiene alguna sugerencia de mejora de la plataforma? \***

*Seleccioneu totes les opcions que corresponguin.*

- No, me gusta tal y como está
- Altres: \_\_\_\_\_

**26. ¿Recomendaría el uso de la plataforma a otras personas trasplantadas? \***

*Maqueu només un oval.*

- Sí, recomendaría su uso *Passeu a ¡Muchas gracias!*
- No recomendaría su uso *Passeu a la pregunta 27.*

*Passeu a ¡Muchas gracias!*

**27. Le agradecemos su sinceridad, indique el motivo por el cual no recomendaría el uso de la plataforma: \***

---

---

---

---

---

**¡Muchas gracias!**

Su opinión nos resulta imprescindible para mejorar el aplicativo que hemos diseñado para usted.

El equipo clínico del Hospital de la Santa Creu i Sant Pau le agradece su colaboración.
