# Supplementary material for: A Mobile App (mHeart) to Detect Medication Nonadherence in the Heart Transplant Population: Validation Study
Source: PubMed Central journal article supplement (PMC7055830; doi:10.2196/15957), 2020-02-04
Supplement: mhealth_v8i2e15957_app8.pdf [file mhealth_v8i2e15957_app8.pdf]

## Multimedia Appendix 8. Demographic and clinical characteristics of the early-stage heart transplant recipients included in the Val-mHeart Study

| Variables                                                                            | N = 31        |
|--------------------------------------------------------------------------------------|---------------|
| Recipient gender (women), n (%)                                                      | 9 (29)        |
| Recipient age at the time of the study, years $\pm$ SD                               | 54 $\pm$ 12   |
| Donor age, years $\pm$ SD                                                            | 49 $\pm$ 12   |
| Donor sex (men), n (%)                                                               | 13 (42)       |
| Time from HTx transplant, years $\pm$ SD                                             | 1.2 $\pm$ 0.8 |
| Body mass index, kg/m <sup>2</sup> $\pm$ SD                                          | 25 $\pm$ 54   |
| Cytomegalovirus mismatch (recipient-/donor+), n (%)                                  | 5 (16)        |
| Heart failure etiology, n (%)                                                        |               |
| • Congenital                                                                         | 4 (13)        |
| • Coronary/ischemic                                                                  | 12 (39)       |
| • Myocarditis                                                                        | 1 (3.2)       |
| • Cardiomyopathy                                                                     | 12 (39)       |
| • Hypertrophic cardiomyopathy                                                        | 1 (3)         |
| • Other                                                                              | 1 (3)         |
| Urgent HTx, n (%)                                                                    | 15 (48)       |
| Total ischemia time, min $\pm$ SD                                                    | 198 $\pm$ 48  |
| Number of recipients with at least 1 episode of ARE, median (Q1-Q3)                  | 4 (13)        |
| AMR, n (%)                                                                           | 1 (5)         |
| CAV, n (%)                                                                           | 9 (29)        |
| LVEF, % $\pm$ SD                                                                     | 66 $\pm$ 8    |
| Educational attainment, n (%)                                                        |               |
| • No schooling                                                                       | 5 (16)        |
| • Middle school graduate                                                             | 13 (42)       |
| • High school graduate                                                               | 7 (23)        |
| • University graduate                                                                | 6 (19)        |
| Employment status, n (%)                                                             |               |
| • Temporary medical leave                                                            | 8 (26)        |
| • Long-term Disability                                                               | 12 (39)       |
| • Retired                                                                            | 7 (23)        |
| • No previous employment                                                             | 2 (7)         |
| • Currently employed                                                                 | 2 (7)         |
| Need or requirement for caregiver, n (%)                                             | 11 (36)       |
| Lives with someone else, n (%)                                                       | 28 (90)       |
| Number of comorbidities                                                              |               |
| • pre-transplant, mean $\pm$ SD (range)                                              | 3.4 $\pm$ 2.5 |
| • post-transplant, mean $\pm$ SD (range)                                             | 2.8 $\pm$ 2.3 |
| Medical clinicians (other than the transplant team), mean $\pm$ SD (range)           | 2.4 $\pm$ 0.8 |
| Number of patients who were always visited by the same primary care physician, n (%) | 28 (90)       |
| Number of primary care visits in the last month, n (%)                               |               |
| • None                                                                               | 20 (65)       |
| • 1-2 visits                                                                         | 11 (36)       |
| • >3 visits                                                                          | None          |
| Reasons for primary care visits, n (%)                                               |               |
| • Medical consultation                                                               | 8 (26)        |
| • Refill prescriptions                                                               | 20 (65)       |
| • Other                                                                              | 3 (10)        |
| mHeart initial patient assessment; n (%)                                             |               |
| • Not very useful                                                                    | 4 (13)        |
| • Useful                                                                             | 22 (71)       |
| • Very useful                                                                        | 4 (13)        |
| • Not yet known until the platform is tested                                         | 1 (3)         |
| Frequency of technology use; n (%)                                                   |               |
| • Frequently                                                                         | 22 (71)       |
| • Occasionally                                                                       | 6 (19)        |
| • Never                                                                              | 3 (10)        |
| Use of health-related technology                                                     | 22 (71)       |
| Patient assistance in using the platform, n (%)                                      |               |
| • Yes                                                                                | 9 (29)        |
| • No                                                                                 | 22 (71)       |
| • Not yet known until the platform is tested                                         | 0 (0)         |

AMR, antibody-mediated rejection; ARE, acute cellular rejection episode; BMI, body mass index; CAV, cardiac allograft vasculopathy; HTx, heart transplantation; LVEF, left ventricular ejection fraction; SD, standard deviation.
